# Supplementary material
Source: PubMed Central journal article supplement (PMC3278475)
Supplement: supp_msr267_lati_TE_supFIG_MBE_09182011.pdf [file supp_msr267_lati_TE_supFIG_MBE_09182011.pdf]

## **SUPPLEMENTARY FIGURES**

### **A living fossil in the genome of a living fossil: Harbinger transposons in the coelacanth genome**

**Jeramiah J. Smith, Kenta Sumiyama and Chris T. Amemiya**

**Supplementary Figure S1 - Amino acid alignment of *lha*-like proteins** – The amino acid sequence of *lha* shares sequence similarity with several vertebrate proteins, but is not overtly similar to any particular group of sequences. The alignment includes all vertebrate blast hits to the predicted *lha* gene from *Latimeria* and covers 141 conserved amino acids from *lha*. All sequences aligning to *lha* are labeled by their GenBank identifiers.

*lha* QHQGSDPDRIDGAPGPKRKRKRR--FKVAEVDLTHGWDAAADIVLQ--AGSTSLAHEE---CQRITTHQWALGHILGIVVEVHHW  
CAH14370 DSDSTKIDMIRIITLPAERKRRPKFKSEKEDLIVTEVITHEAVLFGRETRRSHADADK---DREGIARKITISQPPRSKIDIKHHW  
XP\_001148200 -----RKPKFKSEKEDLIVTEVITHEAVLFGRETRRSHADADK---DREGIARKITISQPPRSKIDIKHHW  
AAI13557 KDSAGPHGRNAGPSTTRAKKRPHTPCQETEVLSKVSHHQLLFGTGLLKAEPTRAYR---VNSRIQAQWALGYCRDWDLDLHHW  
AAI26344 KDSAGPHGRNAGPSTTRAKKRPHTPCQETEVLSKVSHHQLLFGTGLLKAEPTRAYR---VNSRIQAQWALGYCRDWDLDLHHW  
EAW82324 KDSAGPHGRNAGPSTTRAKKRPHTPCQETEVLSKVSHHQLLFGTGLLKAEPTRAYR---VNSRIQAQWALGYCRDWDLDLHHW  
HP\_659440 KDSAGPHGRNAGPSTTRAKKRPHTPCQETEVLSKVSHHQLLFGTGLLKAEPTRAYR---VNSRIQAQWALGYCRDWDLDLHHW  
XP\_001089591 KDLAAGPHGRNAGPSTTRAKKRPHTPCQETEVLSKVSHHQLLFGTGLLKAEPTRAYR---VNSRIQAQWALGYCRDWDLDLHHW  
XP\_519987 KDSAGPHGRNAGPSTTRAKKRPHTPCQETEVLSKVSHHQLLFGTGLLKAEPTRAYR---VNSRIQAQWALGYCRDWDLDLHHW  
XP\_539185 KDSAGPHGRNAGPSTTRAKKRPHTPCQETEVLSKVSHHQLLFGSGLRAREPARYR---VNSRIQAQWALGYCRDWDLDLHHW  
NP\_001075915 KELAARAREHVAS--KTRAKKRPHTPCQETEVLSKVSHHQLLFGSGLRAREPARYR---VNSRIQAQWALGYCRDWDLDLHHW  
XP\_001381738 KDPLATPSPRHNAGPSTTRAKKRPHTPCQETEVLSKVSHHQLLFGTGLLKAEPTRAYR---VNSRIQAQWALGYCRDWDLDLHHW  
XP\_001489117 ILPGPGCVPLRPGP--HERITTKRPHFSPQETEVLSKVSHHQLLFGSGLRAREPARYR---VNSRIQAQWALGYCRDWDLDLHHW  
XP\_001381736 IADPGSTPPOPGH--HERITTKRPHFSPQETEVLSKVSHHQLLFGSGLRAREPARYR---VNSRIQAQWALGYCRDWDLDLHHW  
NP\_001380063 -----GKRRKAFSHDETELVNIVVHFSAALYGEALRTHSAHQ---LDSQQRNIVFLGYIENSIDDLHHW  
XP\_424011 -----GKRRKAFSHDETELVNIVVHFSAALYGEALRTHSAHQ---LDSQQRNIVFLGYIENSIDDLHHW  
NP\_001089601 HQVREIVGASGDPVPTCRKRAAFSHDETELVNIVVHFSAALYGEALRTHSAHQ---LDSQQRNIVFLGYIENSIDDLHHW  
XP\_520284 KAV-----PAKRRKUIFSEREVEIIVVEELKHLLWVHFNAGVPLAASA---AWGILRRVWAVATCRRELPEVKKW  
XP\_001152900 KAV-----PAKRRKUIFSEREVEIIVVEELKHLLWVHFNAGVPLAASA---AWGILRRVWAVATCRRELPEVKKW  
NP\_931045 KAV-----PAKRRKUIFSEREVEIIVVEELKHLLWVHFNAGVPLAASA---AWGILRRVWAVATCRRELPEVKKW  
XP\_001092549 KAV-----PAKRRKUIFSEREVEIIVVEELKHLLWVHFNAGVPLAASA---AWGILRRVWAVATCRRELPEVKKW  
XP\_001092434 KAV-----PAKRRKUIFSEREVEIIVVEELKHLLWVHFNAGVPLAASA---AWGILRRVWAVATCRRELPEVKKW  
AAH21580 KAV-----PAKRRKUIFSEREVEIIVVEELKHLLWVHFNAGVPLAASA---AWGILRRVWAVATCRRELPEVKKW  
XP\_001501275 KAV-----PAKRRKUIFSEREVEIIVVEELKHLLWVHFNAGVPLAASA---AWGILRRVWAVATCRRELPEVKKW  
NP\_001094544 KAV-----PAKRRKUIFSEREVEIIVVEELKHLLWVHFNAGVPLAASA---AWGILRRVWAVATCRRELPEVKKW  
XP\_548443 KAV-----PAKRRKUIFSEREVEIIVVEELKHLLWVHFNAGVPLAASA---AWGILRRVWAVATCRRELPEVKKW  
XP\_001079981 KAV-----PAKRRKUIFSEREVEIIVVEELKHLLWVHFNAGVPLAASA---AWGILRRVWAVATCRRELPEVKKW  
NP\_919316 KAV-----PAKRRKUIFSEREVEIIVVEELKHLLWVHFNAGVPLAASA---AWGILRRVWAVATCRRELPEVKKW  
NP\_001016353 NAT-----PAKRRKUIFSEREVEIIVVEELKHLLWVHFNAGVPLVTSI---AWHDLKRWAVSTCHRELAEVKKW  
AAI28615 NAT-----PAKRRKUIFSEREVEIIVVEELKHLLWVHFNAGVPLVTSI---AWHDLKRWAVSTCHRELAEVKKW  
NP\_001090371 NAT-----PAKRRKUIFSEREVEIIVVEELKHLLWVHFNAGVPLVTSI---AWHDLKRWAVSTCHRELAEVKKW  
NP\_001025863 NASEP-----KPAKRRKUIFSEREVEIIVVEELKHLLWVHFNAGVPLAASA---AWHDLKRWAVSTCHRELAEVKKW  
XP\_691225 NASE-----CAKRRKUIFSEREVEIIVVEELKHLLWVHFNAGVPLAANS---AWHDLKRWAVSTCHRELAEVKKW  
XP\_001520341 NTA-----PVKRRKUIFSEREVEIIVVEELKHLLWVHFNAGVPLAASA---AWGILRRVWAVATCRRELPEVKKW  
CAF89557 NASE-----AAKRRKUIFSEREVEIIVVEELKHLLWVHFNAGVPLAANS---AWGILRRVWAVATCRRELPEVKKW  
NP\_001013508 NSEFDPVYRPPGGLHRRPKRKRSPFQEVVELLSEVQKRHLVGVKTRGSKDLNRR---VLSVTERINERSECHKREVEIIVKRW  
NP\_001070739 NVSSSLALQ---DINIVRYRKRARFVSEVHLLDENPDRHRLVGVKTRGSKDLNRR---KNAETEARVETSEGDREINELIKRW  
NP\_001081092 AHEDLFDGVCPCITLPLRTRKRFVDEELNVLQEVHDMVSQLFGEISVKTPTVVK---DREGIARWALGVITVISEIKRW  
NP\_001089108 AHEDLFDGVCPCITLPLRTRKRFVDEELNVLQEVHDMVSQLFGEISVKTPTVVK---DREGIARWALGVITVISEIKRW

*lha* RDRVSIKRNIAITARR-----ATGGGPPASLTPLEEYARHISTLEVEGIPGGHIDLRK-----  
CAH14370 DDKRPTDMLAPRQGLSG-----PGIGCHTPIHLAHEPATEAALITRAGHFPRAEIDGDSFS----  
XP\_001148200 DDKRPTDMLAPRQGLSG-----PGAGGRAPTVLTAHERATESALITRAGRFPRAEIDGDSFS----  
AAI13557 RDLAVVRRKIGDLKKAH-----GSPGSGKQALAITPVEVYAKTSCQALPEGFSLEPPRATQVD---  
AAI26344 RDLAVVRRKIGDLKKAH-----GSPGSGKQALAITPVEVYAKTSCQALPEGFSLEPPRATQVD---  
EAW82324 RDLAVVRRKIGDLKKAH-----GSPGSGKQALAITPVEVYAKTSCQALPEGFSLEPPRATQVD---  
HP\_659440 RDLAVVRRKIGDLKKAH-----GSPGSGKQALAITPVEVYAKTSCQALPEGFSLEPPRATQVD---  
XP\_001089591 RDLAVVRRKIGDLKKAH-----GSPGSGKQALAITPVEVYAKTSCQALPEGFSLEPPRATQVD---  
XP\_519987 RDLAVVRRKIGDLKKAH-----GSPGSGKQALAITPVEVYAKTSCQALPEGFSLEPPRATQVD---  
XP\_539185 RDLAVVRRKIGDLKCG-----PGPGAPALAITPVEVYAKTSCRAPPEGVDEPPRATQAD---  
NP\_001075915 RDLAVVRRKIGDL-----PRAQALAITPLEDAVAKTSCQALPEGLPPELRRATQID---  
XP\_001381738 RDLAVVRRKIGDLKKAH-----GSPGSGKQALAITPVEVYAKTSCQAGPVGYELRALRSQLD---  
XP\_001489117 RDLGVVRRKLAECPRAP-----AESVAPGLITPVERHVAETYSAPAPPGESQATEPISPRILN---  
XP\_001381736 RDLGVVRRKIGDLKKAH-----TEGQCALVITPVERHVAETYSANHCQESGAEHSP-----  
XP\_001380063 RDLALDVKKITSKHP-----GSSSRT--HLTPLEKIVASTV--TQASDDEEPE--ALDPGE-----  
XP\_424011 RDLALDVKKITSKHP-----PHIRAGGLPKRPLITPLEKIVASTV--LQASHDEPE--ITLDPQGSW---  
NP\_001089601 RDLALDVKKITHRTSGKA-----PLPGVAPLLEKLSPLEDLVASTIGHHCITLDBQEBHPMEGVER---  
XP\_520284 SDLTTEVRRKIAQVRAAVEGEG--APGPTTEEDGAGGPGTCGGSGGGGPAVAVLLITPQCRICHLAGEVTIISLPSITTEHPVALG-----  
XP\_001152900 SDLTTEVRRKIAQVRAAVEGEG--APGPTTEEDGAGGPGTCGGSGGGGPAVAVLLITPQCRICHLAGEVTIISLPSITTEHPVALG-----  
NP\_931045 SDLTTEVRRKIAQVRAAVEGEG--APGPTTEEDGAGGPGTCGGSGGGGPAVAVLLITPQCRICHLAGEVTIISLPSITTEHPVALG-----  
XP\_001092549 SDLTTEVRRKIAQVRAAVEGEG--APGPTTEEDGAGGPGTCGGSGGGGPAVAVLLITPQCRICHLAGEVTIISLPSITTEHPVALG-----  
XP\_001092434 SDLTTEVRRKIAQVRAAVEGEG--APGPTTEEDGAGGPGTCGGSGGGGPAVAVLLITPQCRICHLAGEVTIISLPSITTEHPVALG-----  
AAH21580 SDLTTEVRRKIAQVRAAVEGEG--APGPTTEEDGAGGPGTCGGSGGGGPAVAVLLITPQCRICHLAGEVTIISLPSITTEHPVALG-----  
NP\_001501275 SDLTTEVRRKIAQVRAAVEGEG--APGPTTEEDGAGGPGTCGGSGGGGPAVAVLLITPQCRICHLAGEVTIISLPSITTEHPVALG-----  
NP\_001094544 SDLTTEVRRKIAQVRAAVEGEG--APGPTTEEDGAGGPGTCGGSGGGGPAVAVLLITPQCRICHLAGEVTIISLPSITTEHPVALG-----  
XP\_548443 SDLTTEVRRKIAQVRAAVEGEG--APGPTTEEDGAGGPGTCGGSGGGGPAVAVLLITPQCRICHLAGEVTIISLPSITTEHPVALG-----  
XP\_001079981 SDLTTEVRRKIAQVRAAVEGEG--APGPTTEEDGAGGPGTCGGSGGGGPAVAVLLITPQCRICHLAGEVTIISLPSITTEHPVALG-----  
NP\_919316 SDLTTEVRRKIAQVRAAVEGEG--APGPTTEEDGAGGPGTCGGSGGGGPAVAVLLITPQCRICHLAGEVTIISLPSITTEHPVALG-----  
NP\_001016353 SDLTTEVRRKISAKAAVEG-----EAD-----VETPPVHLITPQCRICHLAGEVTIISLPSITTEHPVALG-----  
AAI28615 SDLTTEVRRKISAKAAVEG-----EAD-----VETPPVHLITPQCRICHLAGEVTIISLPSITTEHPVALG-----  
NP\_001090371 SDLTTEVRRKISAKAAVEG-----EAD-----VETPPVHLITPQCRICHLAGEVTIISLPSITTEHPVALG-----  
NP\_001025863 SDLTTEVRRKIAQVRAAVEG-----GGESQISGGAGTEEDVETATAAPVLLITPQCRICHLAGEVTIISLPSITTEHPVALG-----  
XP\_691225 SDLTTEVRRKIAQVRAAVEG-----EAD-----CTTPVILITPQCRICHLAGEVTIISLPSITTEHPVALG-----  
XP\_001520341 SDLTTEVRRKIAQVRAAVEGEG--PGEGHAAAG-----DADGDLGAPVLLITPQCRICHLAGEVTIISLPSITTEHPVALG-----  
CAF89557 SDLTTEVRRKIAQVRAAVEG-----SAD-----SAAVPLISAKQRICHLAGEVTIISLPSITTEHPVALG-----  
NP\_001013508 ADLACDTRKRVAAKAGATSQAQ--LAQ---HLPIETVHQLIQLSHSRINSSFALDDQDDDDDLAHLSEISQSSSWAHGRPHS--  
NP\_001070739 SDCDITVRLAAQVTCIVVSR--LARNHILSLPHEVIVESILELDDKPIEATVQSRSSRSHDDQEVCE--DEEEDGCVVGH-----  
NP\_001081092 HDLRRKRNKLSVTEPPGHLEA--SVPVFPVPHQR---LIQETIHPHQQGISLDTSSAIFSHAAITVQDREYLDQTVVQ---

**Supplementary Figure S2 - Structure of the pPAC-GFP-1054-RFP-iTol2-Kan PAC clone** – This clone was used for generating the *Tg* (*pPAC-GFP-1054-RFP-iTol2-Kan*) *B6C3* mouse transgenic line.

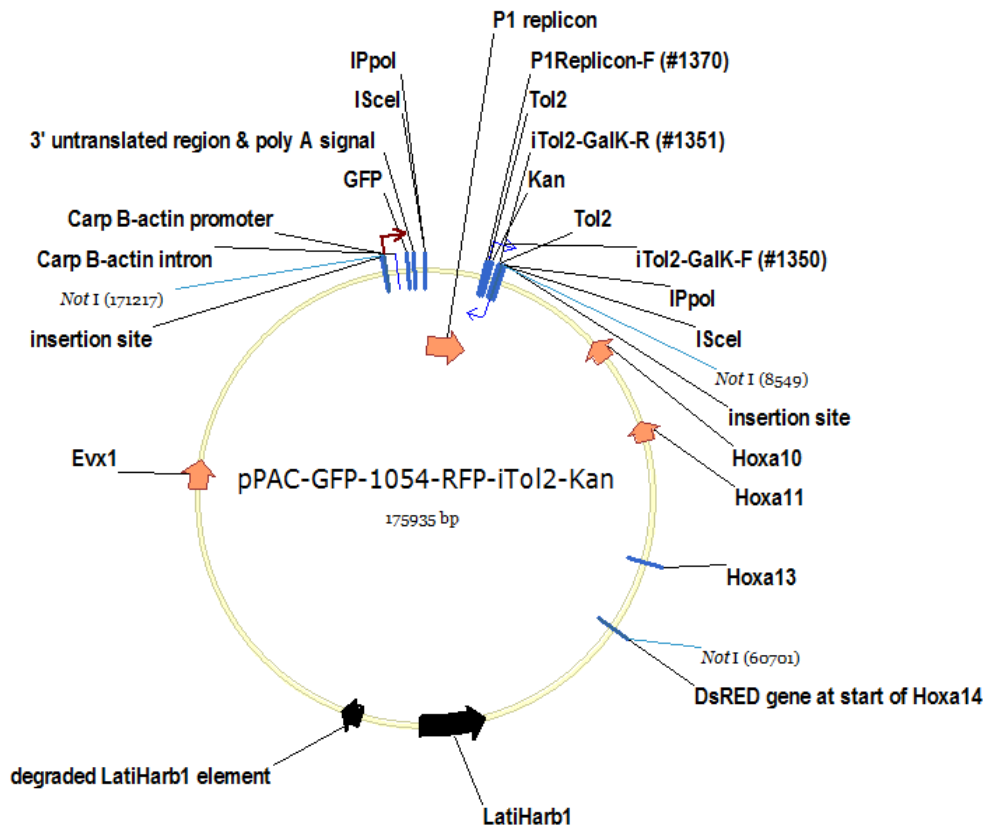

**Supplementary Figure S3 - Southern hybridizations of *lha* gene.** – M = Low Range PFG Marker (NEB #N0350S), marker labels are in kilobases. D, E, and H represent *Lm* genomic heart DNA digested with *Dra*I, *Eco*RI and *Hind*III respectively. Left panel is the ethidium bromide-stained gel and the right panel is the subsequent Southern blot-hybridization with the *lha* probe.

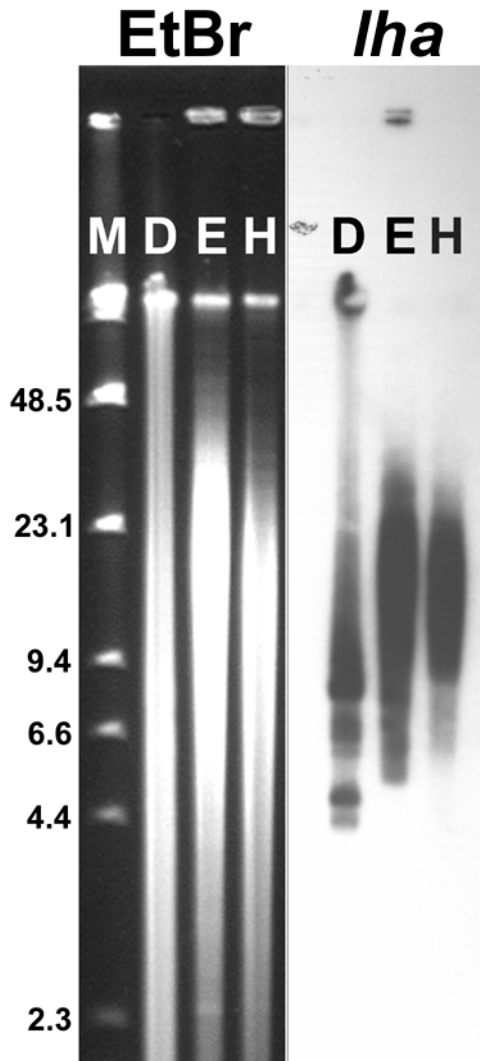

**Supplementary Figure S4 - Hybridization of *lha* gene to a high-density filter of the *Lm* BAC library.** – The *Lm* BAC library was spotted onto 22 cm<sup>2</sup> nylon filters in a 4 x 4 grid pattern (18,432 individual clones per filter) for hybridization screening (Danke et al. 2004). This region of a high density filter represents ~400 clones from the library spotted in duplicate.

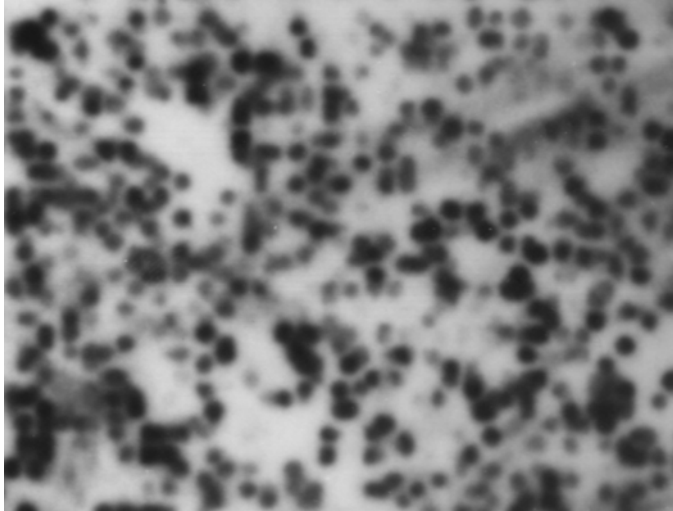

## Literature Cited

Danke J, Miyake T, Powers T, Schein J, Shin H, Bosdet I, Erdmann M, Caldwell R, Amemiya CT. 2004. Genome resource for the Indonesian coelacanth, *Latimeria menadoensis*. *J Exp Zool A Comp Exp Biol* 301:228-234.

Higgins DG, Sharp PM. 1988. CLUSTAL: a package for performing multiple sequence alignment on a microcomputer. *Gene* 73:237-244.

Thompson JD, Gibson TJ, Plewniak F, Jeanmougin F, Higgins DG. 1997. The CLUSTAL\_X windows interface: flexible strategies for multiple sequence alignment aided by quality analysis tools. *Nucleic Acids Res* 25:4876-4882.
