# Supplementary material
Source: PubMed Central journal article supplement (PMC3278475)
Supplement: supp_msr267_lati_TE_supTAB_MBE_09182011.pdf [file supp_msr267_lati_TE_supTAB_MBE_09182011.pdf]

## SUPPLEMENTARY TABLES

### A living fossil in the genome of a living fossil: Harbinger transposons in the coelacanth genome

Jeremiah J. Smith, Kenta Sumiyama and Chris T. Amemiya

Supplementary Table S1 – Summary statistics for searches of known vertebrate repetitive elements in lamprey BACs.

| Element Type                                   | number of Elements <sup>1</sup> | length occupied  | percentage of sequence |
|------------------------------------------------|---------------------------------|------------------|------------------------|
| Retroelements                                  | 915                             | 465414 bp        | 13.78%                 |
| SINEs:                                         | 437                             | 126007 bp        | 3.73%                  |
| LINEs:                                         | 409                             | 327663 bp        | 9.70%                  |
| L2/CR1/Rex                                     | 291                             | 266367 bp        | 7.88%                  |
| R1/LOA/Jockey                                  | 10                              | 9946 bp          | 0.29%                  |
| R2/R4/NeSL                                     | 2                               | 125 bp           | 0%                     |
| RTE/Bov-B                                      | 32                              | 9262 bp          | 0.27%                  |
| L1/CIN4                                        | 51                              | 20465 bp         | 0.61%                  |
| LTR elements:                                  | 69                              | 11744 bp         | 0.35%                  |
| Gypsy/DIRS1                                    | 36                              | 24033 bp         | 0.71%                  |
| Retroviral                                     | 22                              | 2396 bp          | 0.07%                  |
| DNA transposons (excluding <i>Harbingers</i> ) | 120                             | 14001 bp         | 0.21%                  |
| hobo-Activator                                 | 47                              | 4204 bp          | 0.12%                  |
| Tc1-IS630-Pogo                                 | 7                               | 975 bp           | 0.03%                  |
| En-Spm                                         | 20                              | 1460 bp          | 0.04%                  |
| MuDR-IS905                                     | 4                               | 158 bp           | 0%                     |
| PiggyBac                                       | 3                               | 543 bp           | 0.02%                  |
| <i>LatiHarb1</i> <sup>2</sup>                  | <b>18</b>                       | <b>132162 bp</b> | <b>3.91%</b>           |
| Unclassified:                                  | 4                               | 407 bp           | 0.01%                  |
| Total interspersed repeats:                    |                                 | 479822 bp        | 14.20%                 |

|                 |     |          |       |
|-----------------|-----|----------|-------|
| Small RNA:      | 258 | 82910 bp | 2.45% |
| Satellites:     | 8   | 394 bp   | 0.01% |
| Simple repeats: | 700 | 28376 bp | 0.84% |
| Low complexity: | 889 | 33119 bp | 0.98% |

**The query species was assumed to be vertebrata RepeatMasker version open-3.2.5 , default mode run with cross\_match version 0.990329, RepBase Update 20080801, RM database version 20080801.**

- 1) Most repeats fragmented by insertions or deletions have been counted as one element**
- 2) Sequence with high-identity to the *LatiHarb1* consensus, identified by alignment to a manually curated instance of the *LatiHarb1* element (i.e. external to the RepeatMasker search). RepeatMasker also identified a few fragments of Harbinger superfamily elements, which accounted for only 0.13% of *Latimeria* BAC sequence.**

**Supplementary Table S2 - Summary statistics for GeneScan predictions within 8 individual instances of the *LatiT1* element that were identified from the BAC sequence dataset.**

| Genbank Accession / Clone | Range (in clone) | Feature       | Start       | End         | Strand | I/Ac | Do/T  | CR    | P     | Score |  |
|---------------------------|------------------|---------------|-------------|-------------|--------|------|-------|-------|-------|-------|--|
| VMRC4_103A21_106D14       | 199376-207010    | Exon 1        | 436         | 916         | +      | 93   | 103   | 514   | 0.999 | 49.22 |  |
|                           |                  | Exon 2        | 1290        | 1418        | +      | 69   | 115   | 169   | 0.922 | 19.54 |  |
|                           |                  | Exon 3        | 1540        | 2313        | +      | 111  | 81    | 573   | 0.957 | 51.86 |  |
|                           |                  | Exon 4        | 2762        | 3009        | +      | 36   | 42    | 163   | 0.847 | 3.45  |  |
|                           |                  | Poly A Signal | 3017        | 3022        | +      |      |       |       |       |       |  |
|                           |                  | Poly A Signal | 3059        | 3054        | -      |      |       |       |       |       |  |
|                           |                  | Exon 4        | 4134        | 3193        | -      | -41  | 44    | 681   | 0.757 | 44.25 |  |
|                           |                  | Exon 3        | 5615        | 5403        | -      | 111  | 72    | 103   | 0.776 | 11.13 |  |
|                           |                  | Exon 2        | 6038        | 5958        | -      | 57   | 47    | 74    | 0.515 | 1.19  |  |
|                           |                  | Exon 1        | 6557        | 6435        | -      | 94   | 110   | 198   | 0.995 | 22.39 |  |
| FJ497005                  | 82448-90459      | Exon 1        | 379         | 859 (862)   | +      | 93   | 103   | 485   | 0.999 | 46.32 |  |
|                           |                  | Exon 2        | 1233 (1161) | 1361        | +      | 88   | 115   | 205   | 0.976 | 25.04 |  |
|                           |                  | Exon 3        | 1483        | 2720        | +      | 113  | 43    | 932   | 0.974 | 84.46 |  |
|                           |                  | Poly A Signal | 2892        | 2897        | +      |      |       |       |       |       |  |
|                           |                  | Poly A Signal | 2941        | 2936        | -      |      |       |       |       |       |  |
|                           |                  | Exon 6        | 3517 (3482) | 3101        | -      | 1    | 49    | 395   | 0.843 | 23.26 |  |
|                           |                  | Exon 5        | 3992        | 3686 (3621) | -      | 19   | 13    | 326   | 0.467 | 15.92 |  |
|                           |                  | Exon 4        | 4351        | 4104        | -      | 48   | 89    | 193   | 0.575 | 12.24 |  |
|                           |                  | Exon 3        | 5971        | 5759        | -      | 115  | 72    | 136   | 0.827 | 14.83 |  |
|                           |                  | Exon 2        | 6397        | 6317        | -      | 94   | 47    | 86    | 0.976 | 6.09  |  |
| Exon 1                    | 6870             | 6748          | -           | 94          | 110    | 152  | 0.997 | 17.06 |       |       |  |
| FJ497007                  | 111628-120116    | Exon 1        | 379         | 859         | +      | 93   | 103   | 563   | 0.999 | 54.12 |  |
|                           |                  | Exon 2        | 1162        | 1346        | +      | 94   | 12    | 158   | 0.388 | 9.51  |  |

|                     |               |               |      |      |   |     |     |     |       |       |
|---------------------|---------------|---------------|------|------|---|-----|-----|-----|-------|-------|
|                     |               | Exon 3        | 1504 | 2286 | + | 24  | 12  | 558 | 0.26  | 34.98 |
|                     |               | Exon 4        | 2338 | 2667 | + | 40  | 43  | 310 | 0.388 | 17.4  |
|                     |               | Poly A Signal | 2839 | 2844 | + |     |     |     |       |       |
|                     |               | Poly A Signal | 2888 | 2883 | - |     |     |     |       |       |
|                     |               | Exon 3        | 3428 | 3049 | - | 114 | 49  | 480 | 0.998 | 42.72 |
|                     |               | Exon 2        | 4373 | 3567 | - | -3  | 65  | 543 | 0.748 | 35.84 |
|                     |               | Exon 1        | 4783 | 4711 | - | 89  | 94  | 64  | 0.989 | 8.42  |
|                     |               | Poly A Signal | 4930 | 4925 | - |     |     |     |       |       |
|                     |               | Exon 5        | 5596 | 5543 | - | 107 | 49  | 68  | 0.99  | 3.26  |
|                     |               | Exon 4        | 6429 | 6220 | - | 108 | 91  | 111 | 0.893 | 13.73 |
|                     |               | Exon 3        | 7338 | 7172 | - | -18 | 75  | 161 | 0.061 | 5.08  |
|                     |               | Exon 2        | 7874 | 7719 | - | 64  | 68  | 64  | 0.11  | 3.17  |
|                     |               | Exon 1        | 8192 | 7913 | - | -38 | 76  | 240 | 0.066 | 8.5   |
| <b>FJ497008</b>     | 469222-477589 | Exon 1        | 336  | 816  | + | 93  | 103 | 595 | 0.999 | 57.32 |
|                     |               | Exon 2        | 1119 | 1310 | + | 94  | 115 | 123 | 0.999 | 16.27 |
|                     |               | Exon 3        | 1432 | 2579 | + | 137 | 43  | 943 | 0.998 | 88.25 |
|                     |               | Poly A Signal | 2751 | 2756 | + |     |     |     |       |       |
|                     |               | Poly A Signal | 2800 | 2795 | - |     |     |     |       |       |
|                     |               | Exon 7        | 3339 | 2960 | - | 116 | 49  | 448 | 0.999 | 39.72 |
|                     |               | Exon 6        | 4284 | 3478 | - | -3  | 65  | 665 | 0.372 | 48.04 |
|                     |               | Exon 5        | 5170 | 5140 | - | 121 | -24 | 8   | 0.011 | -8.27 |
|                     |               | Exon 4        | 6344 | 6135 | - | 103 | 91  | 76  | 0.406 | 9.73  |
|                     |               | Exon 3        | 6750 | 6564 | - | 102 | 25  | 116 | 0.288 | 7.6   |
|                     |               | Exon 2        | 7778 | 7624 | - | 68  | 68  | 44  | 0.179 | 0.46  |
|                     |               | Exon 1        | 8071 | 7838 | - | -38 | 80  | 231 | 0.705 | 8.82  |
| <b>VMRC4_217L16</b> | 156711-165205 | Exon 1        | 375  | 855  | + | 93  | 103 | 535 | 0.998 | 51.32 |
|                     |               | Exon 2        | 1158 | 1361 | + | 94  | 115 | 175 | 0.717 | 21.19 |

|                 |               |               |      |      |   |     |     |     |       |       |
|-----------------|---------------|---------------|------|------|---|-----|-----|-----|-------|-------|
|                 |               | Exon 3        | 1483 | 1821 | + | 129 | 100 | 193 | 0.99  | 21.33 |
|                 |               | Exon 4        | 1919 | 2664 | + | 38  | 43  | 675 | 0.591 | 52.87 |
|                 |               | Poly A Signal | 2836 | 2841 | + |     |     |     |       |       |
|                 |               | Poly A Signal | 2885 | 2880 | - |     |     |     |       |       |
|                 |               | Exon 5        | 3159 | 3043 | - | 53  | 49  | 199 | 0.998 | 11.97 |
|                 |               | Exon 4        | 3422 | 3232 | - | 114 | 75  | 96  | 0.527 | 11.41 |
|                 |               | Exon 3        | 3655 | 3561 | - | 37  | 65  | 32  | 0.927 | -3.43 |
|                 |               | Exon 2        | 3972 | 3704 | - | 45  | 86  | 168 | 0.203 | 9.88  |
|                 |               | Exon 1        | 7313 | 7182 | - | 69  | 75  | 165 | 0.915 | 13.57 |
| <b>AC150309</b> | 158322-166488 | Exon 1        | 375  | 855  | + | 93  | 103 | 618 | 0.999 | 59.62 |
|                 |               | Exon 2        | 1239 | 1361 | + | 69  | 115 | 155 | 0.696 | 18.03 |
|                 |               | Exon 3        | 1483 | 2516 | + | 113 | 42  | 912 | 0.988 | 82.79 |
|                 |               | Poly A Signal | 2835 | 2840 | + |     |     |     |       |       |
|                 |               | Poly A Signal | 2884 | 2879 | - |     |     |     |       |       |
|                 |               | Exon 5        | 3225 | 3037 | - | 14  | 49  | 309 | 0.682 | 18.02 |
|                 |               | Exon 4        | 3966 | 3505 | - | 45  | 35  | 347 | 0.484 | 19.8  |
|                 |               | Exon 3        | 4358 | 4008 | - | -16 | 32  | 304 | 0.288 | 11.21 |
|                 |               | Exon 2        | 6270 | 6050 | - | 99  | 81  | 128 | 0.78  | 12.45 |
|                 |               | Exon 1        | 7071 | 6963 | - | 103 | -13 | 129 | 0.084 | 4.8   |
| <b>AC150284</b> | 166488-158322 | Exon 1        | 375  | 855  | + | 93  | 103 | 618 | 0.999 | 59.62 |
|                 |               | Exon 2        | 1239 | 1361 | + | 69  | 115 | 155 | 0.696 | 18.03 |
|                 |               | Exon 3        | 1483 | 2516 | + | 113 | 42  | 912 | 0.988 | 82.79 |
|                 |               | Poly A Signal | 2835 | 2840 | + |     |     |     |       |       |
|                 |               | Poly A Signal | 2884 | 2879 | - |     |     |     |       |       |
|                 |               | Exon 5        | 3225 | 3037 | - | 14  | 49  | 309 | 0.682 | 18.02 |
|                 |               | Exon 4        | 3966 | 3505 | - | 45  | 35  | 347 | 0.484 | 19.8  |
|                 |               | Exon 3        | 4358 | 4008 | - | -16 | 32  | 304 | 0.288 | 11.21 |

|        |      |      |   |     |     |     |       |       |
|--------|------|------|---|-----|-----|-----|-------|-------|
| Exon 2 | 6270 | 6050 | - | 99  | 81  | 128 | 0.78  | 12.45 |
| Exon 1 | 7071 | 6963 | - | 103 | -13 | 129 | 0.084 | 4.8   |

I/Ac = initiation signal or 3' splice site score, Do/T = 5' splice site or termination signal score. CR = coding region score, P = probability of exon, Score = GENESCAN score. Values shown in parentheses are exon boundaries observed from transgenic mouse transcripts.

**Supplementary Table S3 - Summary statistics for *GeneMark.hmm-E* predictions within 8 individual instances of the *LatiT1* element that were identified from the BAC sequence dataset.**

| <b>Genbank Accession /<br/>Clone</b> | <b>Range<br/>(in clone)</b> | <b>Gene #</b>   | <b>Exon #</b> | <b>Strand</b> | <b>Exon Type</b> | <b>Exon Start</b> | <b>Exon End</b> |      |      |
|--------------------------------------|-----------------------------|-----------------|---------------|---------------|------------------|-------------------|-----------------|------|------|
| <b>VMRC4_103A21_106D14</b>           | 199376-207010               | 1               | 1             | +             | Initial          | 440               | 920             |      |      |
|                                      |                             | 1               | 2             | +             | Internal         | 1294              | 1422            |      |      |
|                                      |                             | 1               | 3             | +             | Internal         | 1544              | 1891            |      |      |
|                                      |                             | 1               | 4             | +             | Terminal         | 2049              | 2107            |      |      |
|                                      |                             | 2               | 2             | -             | Terminal         | 2738              | 3141            |      |      |
|                                      |                             | 2               | 1             | -             | Initial          | 3280              | 3619            |      |      |
|                                      |                             | 3               | 3             | -             | Terminal         | 5008              | 5061            |      |      |
|                                      |                             | 3               | 2             | -             | Internal         | 5407              | 5619            |      |      |
|                                      |                             | 3               | 1             | -             | Initial          | 6439              | 6561            |      |      |
|                                      |                             | 4               | 1             | +             | Initial          | 6744              | 6806            |      |      |
|                                      |                             | <b>FJ497005</b> | 82448-90459   | 1             | 1                | +                 | Initial         | 375  | 855  |
|                                      |                             |                 |               | 1             | 2                | +                 | Internal        | 1229 | 1357 |
|                                      |                             |                 |               | 1             | 3                | +                 | Internal        | 1479 | 1681 |
|                                      |                             |                 |               | 1             | 4                | +                 | Internal        | 2387 | 2513 |
|                                      |                             |                 |               | 1             | 5                | +                 | Terminal        | 2624 | 2655 |
|                                      |                             |                 |               | 2             | 2                | -                 | Terminal        | 2658 | 2710 |
| 2                                    | 1                           |                 |               | -             | Initial          | 3156              | 3369            |      |      |
| 3                                    | 2                           |                 |               | -             | Terminal         | 3673              | 3916            |      |      |
| 3                                    | 1                           |                 |               | -             | Initial          | 4166              | 4347            |      |      |
| 4                                    | 2                           |                 |               | -             | Terminal         | 5361              | 5414            |      |      |
| 4                                    | 1                           |                 |               | -             | Initial          | 5755              | 5877            |      |      |

|                     |               |   |     |          |      |      |
|---------------------|---------------|---|-----|----------|------|------|
|                     |               | 5 | 1 + | Initial  | 7459 | 7495 |
| <b>FJ497007</b>     | 111628-120116 | 1 | 1 + | Initial  | 382  | 862  |
|                     |               | 1 | 2 + | Internal | 1240 | 1368 |
|                     |               | 1 | 3 + | Internal | 2097 | 2110 |
|                     |               | 1 | 4 + | Internal | 2341 | 2467 |
|                     |               | 1 | 5 + | Terminal | 2578 | 2609 |
|                     |               | 2 | 2 - | Terminal | 3052 | 3431 |
|                     |               | 2 | 1 - | Initial  | 3570 | 3909 |
|                     |               | 3 | 3 - | Terminal | 5546 | 5599 |
|                     |               | 3 | 2 - | Internal | 6223 | 6432 |
|                     |               | 3 | 1 - | Initial  | 7175 | 7306 |
|                     |               | 4 | 1 - | Terminal | 7578 | 7662 |
| <b>FJ497008</b>     | 469222-477589 | 1 | 1 + | Initial  | 339  | 819  |
|                     |               | 1 | 2 + | Internal | 1435 | 1761 |
|                     |               | 1 | 3 + | Internal | 1879 | 2379 |
|                     |               | 1 | 4 + | Terminal | 2490 | 2521 |
|                     |               | 2 | 2 - | Terminal | 2963 | 3342 |
|                     |               | 2 | 1 - | Initial  | 3481 | 3820 |
|                     |               | 3 | 3 - | Terminal | 5441 | 5494 |
|                     |               | 3 | 2 - | Internal | 6138 | 6347 |
|                     |               | 3 | 1 - | Initial  | 7088 | 7219 |
| <b>VMRC4_217L16</b> | 156711-165205 | 1 | 1 + | Initial  | 375  | 855  |



|                 |               |   |     |          |      |      |
|-----------------|---------------|---|-----|----------|------|------|
|                 |               | 1 | 2 + | Internal | 1233 | 1361 |
|                 |               | 1 | 3 + | Internal | 1483 | 1821 |
|                 |               | 1 | 4 + | Internal | 1940 | 2461 |
|                 |               | 1 | 5 + | Terminal | 2572 | 2603 |
|                 |               | 2 | 2 - | Terminal | 3043 | 3159 |
|                 |               | 2 | 1 - | Initial  | 3214 | 3441 |
|                 |               | 3 | 2 - | Terminal | 5532 | 5585 |
|                 |               | 3 | 1 - | Initial  | 7182 | 7313 |
| <b>AC150309</b> | 158322-166488 | 1 | 1 + | Initial  | 378  | 858  |
|                 |               | 1 | 2 + | Internal | 1242 | 1364 |
|                 |               | 1 | 3 + | Internal | 1486 | 1824 |
|                 |               | 1 | 4 + | Terminal | 1942 | 2519 |
|                 |               | 2 | 2 - | Terminal | 3040 | 3156 |
|                 |               | 2 | 1 - | Initial  | 3625 | 3897 |
|                 |               | 3 | 2 - | Terminal | 5510 | 5563 |
|                 |               | 3 | 1 - | Internal | 6053 | 6172 |
| <b>AC150284</b> | 166488-158322 | 1 | 1 + | Initial  | 378  | 858  |
|                 |               | 1 | 2 + | Internal | 1242 | 1364 |
|                 |               | 1 | 3 + | Internal | 1486 | 1824 |
|                 |               | 1 | 4 + | Terminal | 1942 | 2519 |
|                 |               | 2 | 2 - | Terminal | 3040 | 3156 |
|                 |               | 2 | 1 - | Initial  | 3625 | 3897 |
|                 |               | 3 | 2 - | Terminal | 5510 | 5563 |
|                 |               | 3 | 1 - | Internal | 6053 | 6172 |

**Supplementary Table S4 - Summary statistics for BLAST alignments between the predicted *LatiHarb1 tpase* amino acid sequence and similar proteins in Genbank and Rebase archives.**

| <b>Sequence ID</b>                                                                                                        | <b>Alignment<br/>Bitscore</b> | <b>% coverage<br/>of <i>tpase</i></b> | <b>% identity over<br/>aligned region</b> |
|---------------------------------------------------------------------------------------------------------------------------|-------------------------------|---------------------------------------|-------------------------------------------|
| Harbinger-5_XT*                                                                                                           | 266                           | 73%                                   | 39%                                       |
| HARBINGER3_DR*                                                                                                            | 262                           | 59%                                   | 42%                                       |
| Harbinger-1_XT*                                                                                                           | 187                           | 53%                                   | 43%                                       |
| gil72158326 reflXP_794452.1  PREDICTED: hypothetical protein<br>[ <i>Strongylocentrotus purpuratus</i> ]                  | 185                           | 65%                                   | 33%                                       |
| gil72158323 reflXP_794409.1  PREDICTED: hypothetical protein<br>[ <i>Strongylocentrotus purpuratus</i> ]                  | 182                           | 65%                                   | 32%                                       |
| HARBINGER2_DR*                                                                                                            | 180                           | 62%                                   | 33%                                       |
| gil157423504 gb AAI53379.1  Zgc:162945 [ <i>Danio rerio</i> ]                                                             | 173                           | 60%                                   | 30%                                       |
| gil115913060 reflXP_001188248.1  PREDICTED: hypothetical protein,<br>partial [ <i>Strongylocentrotus purpuratus</i> ]     | 168                           | 40%                                   | 39%                                       |
| gil156546775 reflXP_001605652.1  PREDICTED: putative nuclease<br>HARBI1-like [ <i>Nasonia vitripennis</i> ]               | 163                           | 59%                                   | 33%                                       |
| gil149022650 gb EDL79544.1  rCG26755 [ <i>Rattus norvegicus</i> ]                                                         | 162                           | 45%                                   | 37%                                       |
| gil156539873 reflXP_001599679.1  PREDICTED: similar to<br>ENSANGP00000014470 [ <i>Nasonia vitripennis</i> ]               | 157                           | 57%                                   | 33%                                       |
| gil72158329 reflXP_794543.1  PREDICTED: hypothetical protein<br>[ <i>Strongylocentrotus purpuratus</i> ]                  | 148                           | 46%                                   | 36%                                       |
| Harbinger-4_XT*                                                                                                           | 146                           | 48%                                   | 29%                                       |
| gil149537657 reflXP_001519824.1  PREDICTED: putative nuclease<br>HARBI1-like, partial [ <i>Ornithorhynchus anatinus</i> ] | 145                           | 40%                                   | 38%                                       |
| gil26334701 dbj BAC31051.1  unnamed protein product [ <i>Mus musculus</i> ]                                               | 142                           | 43%                                   | 35%                                       |
| gil26351017 dbj BAC39145.1  unnamed protein product [ <i>Mus musculus</i> ]                                               | 142                           | 43%                                   | 35%                                       |
| gil72009676 reflXP_785880.1  PREDICTED: hypothetical protein<br>[ <i>Strongylocentrotus purpuratus</i> ]                  | 139                           | 42%                                   | 35%                                       |
| gil115956159 reflXP_001188637.1  PREDICTED: hypothetical protein<br>[ <i>Strongylocentrotus purpuratus</i> ]              | 138                           | 25%                                   | 42%                                       |
| gil115889710 reflXP_001183641.1  PREDICTED: hypothetical protein,<br>partial [ <i>Strongylocentrotus purpuratus</i> ]     | 122                           | 25%                                   | 42%                                       |
| gil115938434 reflXP_001201441.1  PREDICTED: hypothetical protein,                                                         | 122                           | 25%                                   | 41%                                       |

|                                                               |      |     |     |
|---------------------------------------------------------------|------|-----|-----|
| partial [ <i>Strongylocentrotus purpuratus</i> ]              |      |     |     |
| gil156540836 reflXP_001601490.1  PREDICTED: putative nuclease |      |     |     |
| HARBI1-like [ <i>Nasonia vitripennis</i> ]                    | 111  | 49% | 29% |
| gil156539627 reflXP_001600349.1  PREDICTED: similar to        |      |     |     |
| ENSANGP00000014578 [ <i>Nasonia vitripennis</i> ]             | 103  | 40% | 32% |
| gil156539496 reflXP_001600321.1  PREDICTED: similar to        |      |     |     |
| ENSANGP00000014578 [ <i>Nasonia vitripennis</i> ]             | 97.4 | 40% | 31% |

**Sequence identifiers marked with an asterisk are from Rebase, all others are from GenBank.**
